# Supplementary material
Source: PubMed Central journal article supplement (PMC8926938)
Supplement: NIHMS1766773-supplement-Supp_Materials.pdf [file NIHMS1766773-supplement-Supp_Materials.pdf]

**Figure S1.** Blood pressure in intensive and standard treatment groups during trial and cohort phases, stratified by estimated glomerular filtration rate (eGFR).

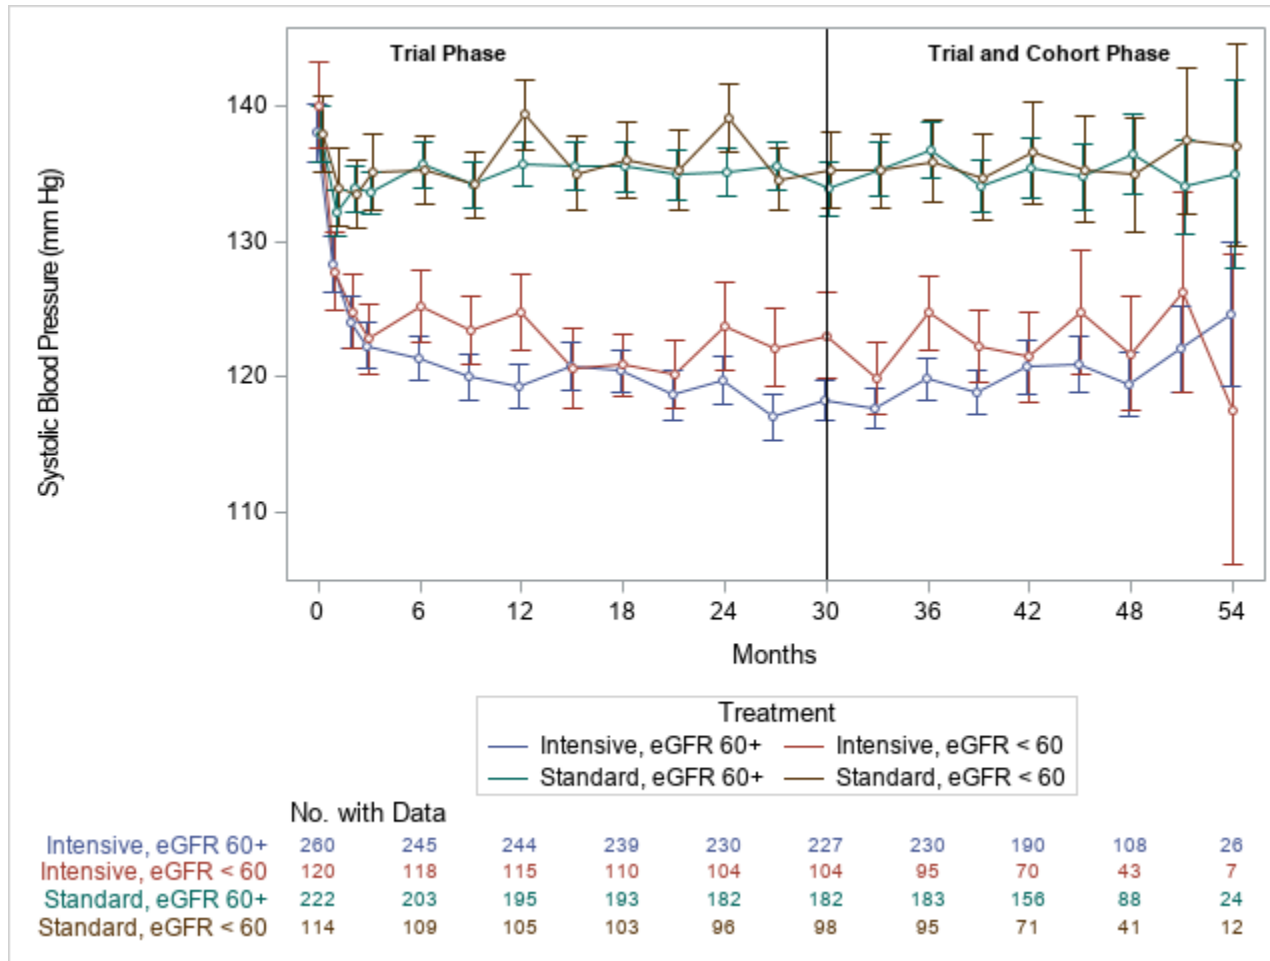

**Figure S2.** Blood pressure in intensive and standard treatment groups during trial and cohort phases, stratified by urine albumin to creatinine ratio (ACR).

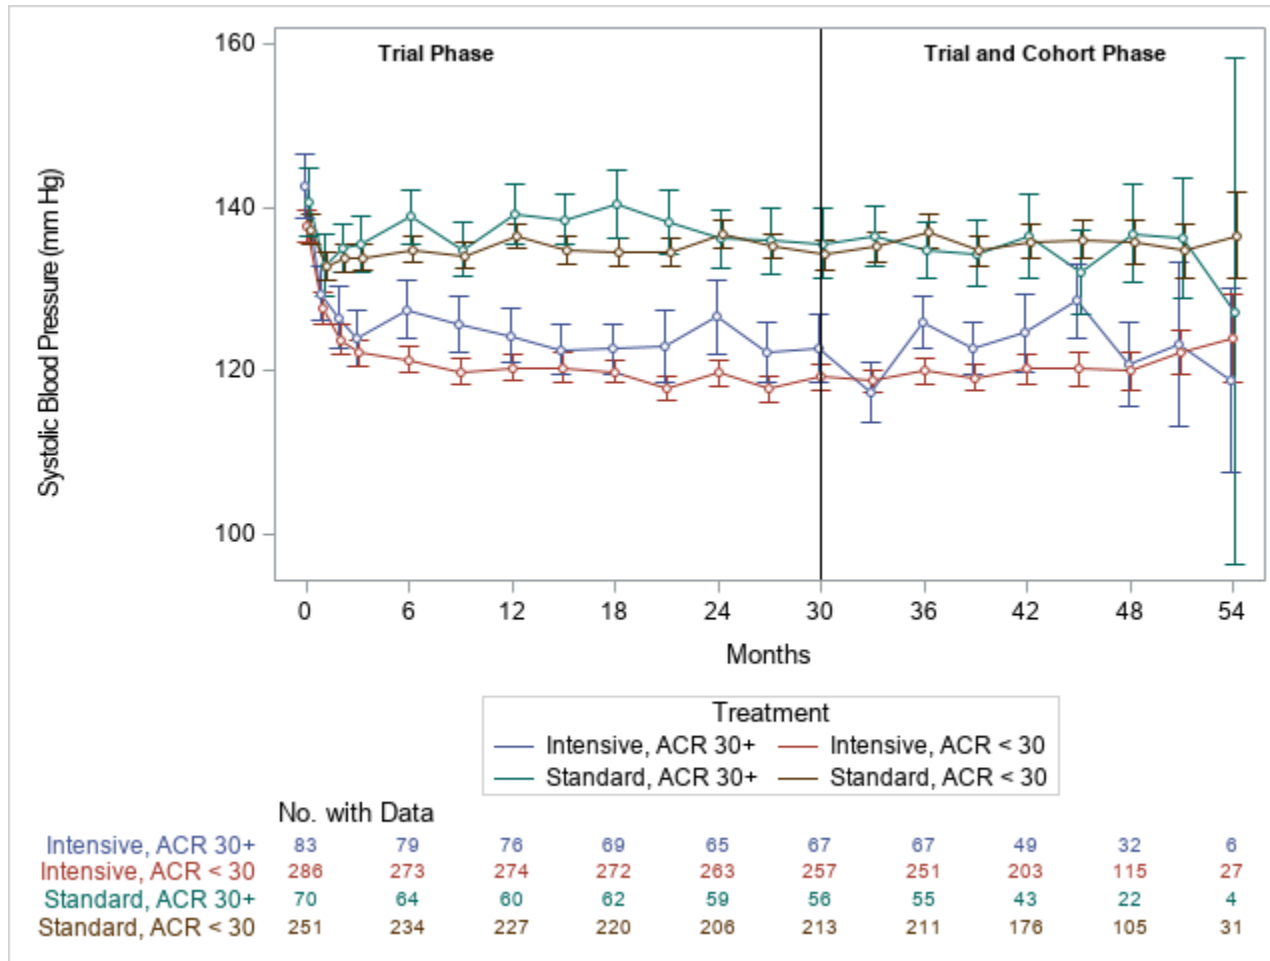

**Figure S3.** Effect of intensive versus standard BP treatment on change in cerebral blood flow (Panel A), white matter lesion volume (Panel B), and total brain volume (Panel C) expressed as z-scores, by baseline estimated glomerular filtration rate and urine albumin to creatinine ratio.

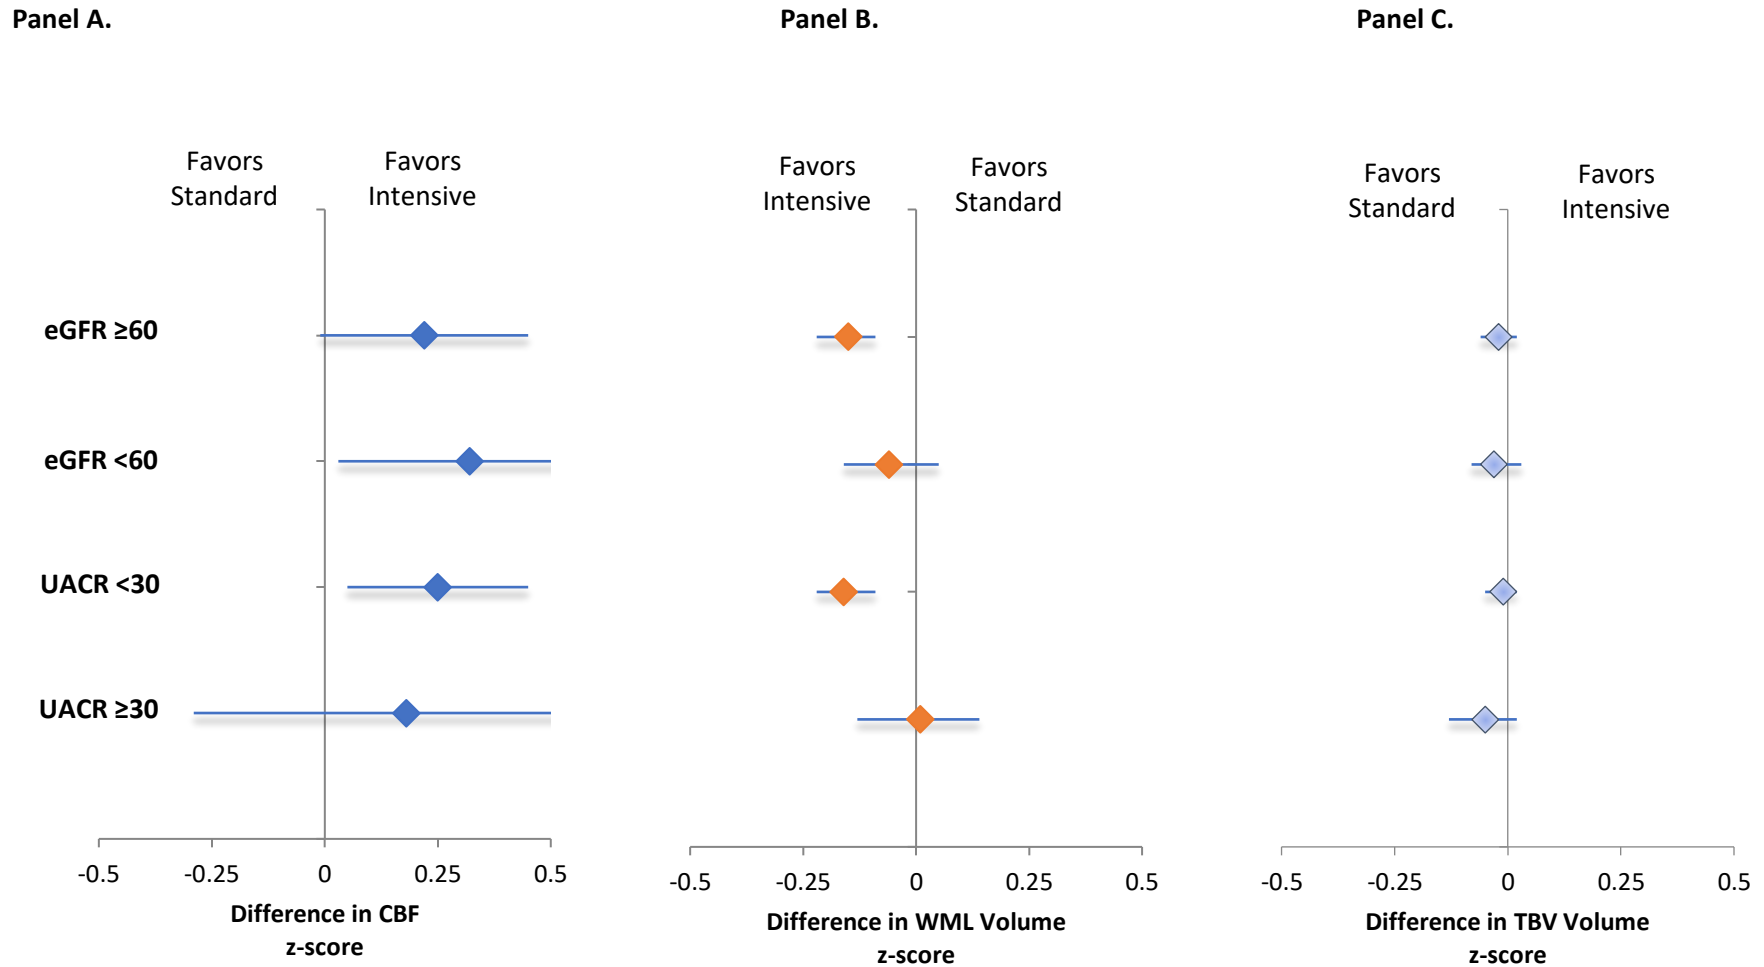

**Table S1.** Cerebral blood flow at follow-up, with and without correction for hematocrit, by baseline estimated glomerular filtration rate (eGFR) and urine albumin to creatinine ratio (UACR).

| Kidney marker                          | Cerebral blood flow, in mL/100 g/min |                          |
|----------------------------------------|--------------------------------------|--------------------------|
|                                        | Uncorrected                          | Corrected for hematocrit |
|                                        | Mean (SD)                            |                          |
| eGFR ≥ 60<br>ml/min/1.73m <sup>2</sup> | 37.82 (10.21)                        | 37.19 (10.69)            |
| eGFR < 60<br>ml/min/1.73m <sup>2</sup> | 37.82 (10.31)                        | 37.08 (10.82)            |
| UACR < 30 mg/g                         | 38.36 (10.22)                        | 37.46 (10.78)            |
| UACR ≥ 30 mg/g                         | 35.54 (10.05)                        | 35.86 (10.44)            |

**Table S3.** Baseline characteristics of trial participants by MRI data completeness

| Characteristic                  | Follow up MRI<br>(n=492) | No Follow up MRI<br>(n=223) | p-value |
|---------------------------------|--------------------------|-----------------------------|---------|
| Age                             | 68.0 (8.4)               | 67.8 (9.1)                  | 0.8     |
| Female Sex                      | 179 (36.4%)              | 104 (46.6%)                 | 0.01    |
| Race                            |                          |                             | 0.04    |
| White                           | 323 (65.7%)              | 122 (54.7%)                 |         |
| Black                           | 138 (28.1%)              | 83 (37.2%)                  |         |
| Hispanic                        | 22 (4.5%)                | 14 (6.3%)                   |         |
| Other                           | 9 (1.8%)                 | 4 (1.8%)                    |         |
| Education                       |                          |                             | 0.3     |
| < high school                   | 36 (7.3%)                | 17 (7.6%)                   |         |
| High school diploma             | 68 (13.8%)               | 35 (15.7%)                  |         |
| Post high school                | 166 (33.7%)              | 87 (39.0%)                  |         |
| College degree                  | 222 (45.1%)              | 84 (37.7%)                  |         |
| Smoking                         |                          |                             | 0.6     |
| Never                           | 230 (46.8%)              | 95 (42.6%)                  |         |
| Former                          | 205 (41.7%)              | 99 (44.4%)                  |         |
| Current                         | 57 (11.6%)               | 29 (13.0%)                  |         |
| Alcohol                         |                          |                             | 0.02    |
| Non-drinker                     | 180 (38.8%)              | 107 (51.4%)                 |         |
| Light Drinker                   | 116 (25.0%)              | 46 (22.1%)                  |         |
| Moderate Drinker                | 108 (23.3%)              | 33 (15.9%)                  |         |
| Heavy Drinker                   | 60 (12.9%)               | 22 (10.6%)                  |         |
| History of CVD                  | 59 (12.0%)               | 43 (19.3%)                  | 0.01    |
| ACE Inhibitor/ARB               | 290 (58.9%)              | 124 (55.6%)                 | 0.4     |
| Systolic BP, mm Hg              | 137.5 (16.2)             | 140.0 (16.8)                | 0.05    |
| Diastolic BP, mm Hg             | 77.6 (11.4)              | 77.7 (11.9)                 | 0.9     |
| eGFR, ml/min/1.73m <sup>2</sup> | 70.3 (20.5)              | 70.7 (22.5)                 | 0.8     |
| UACR, mg/g                      | 9.7 (5.4, 20.8)          | 10.7 (6.4, 33.8)            | 0.04    |
| Hematocrit*                     | 41.4 (4.2)               | 40.6 (4.0)                  | 0.1     |

Results are presented as N and (%), or mean (standard deviation).

P-values based on Chi-square or t-test with the exception of urine albumin to creatinine ratio which is based on Wilcoxon rank sum test

\* Measured at closeout

Abbreviations: GFR – glomerular filtration rate, CVD – cardiovascular disease, ACE – angiotensin converting enzyme inhibitor, ARB – angiotensin receptor blocker, BP – blood pressure, UACR – urine albumin to creatinine ratio

**Table S3.** Effect of SPRINT intervention on change in cerebral blood flow, white matter lesion volume, and total brain volume, stratified by baseline eGFR using the Chronic Kidney Disease Epidemiology equation.

| MRI measure                               | Intensive                  |                            |                         | Standard                   |                            |                         | Difference in Change (95% CI) | P for interaction |
|-------------------------------------------|----------------------------|----------------------------|-------------------------|----------------------------|----------------------------|-------------------------|-------------------------------|-------------------|
|                                           | Baseline (95% CI)          | Follow-up (95% CI)         | Change (95% CI)         | Baseline (95% CI)          | Follow-up (95% CI)         | Change (95% CI)         |                               |                   |
| Global cerebral blood flow (mL/100 g/min) |                            |                            |                         |                            |                            |                         |                               | 0.51              |
| eGFR ≥60                                  | 36.87<br>(33.42, 40.31)    | 38.37<br>(34.74, 42.0)     | 1.58<br>(-0.16, 3.17)   | 35.66<br>(32.21, 39.12)    | 34.91<br>(31.29, 38.52)    | -0.76<br>(-2.45, 0.94)  | 2.26<br>(-0.11, 4.62)         |                   |
| eGFR <60                                  | 37.13<br>(33.19, 41.07)    | 38.2<br>(34.05, 42.34)     | 1.07<br>(-1, 3.14)      | 37.69<br>(33.64, 41.73)    | 35.09<br>(30.73, 39.46)    | -2.59<br>(-4.96, -0.23) | 3.66<br>(0.53, 6.8)           |                   |
| WML volume, asinh(cm <sup>3</sup> )       |                            |                            |                         |                            |                            |                         |                               | 0.03              |
| eGFR ≥60                                  | 1.89<br>(1.75, 2.03)       | 2.01<br>(1.87, 2.15)       | 0.12<br>(0.08, 0.17)    | 1.84<br>(1.7, 1.99)        | 2.13<br>(1.98, 2.28)       | 0.28<br>(0.23, 0.33)    | -0.16<br>(-0.23, -0.09)       |                   |
| eGFR <60                                  | 2.31<br>(2.13, 2.49)       | 2.53<br>(2.35, 2.72)       | 0.22<br>(0.15, 0.29)    | 2.17<br>(1.98, 2.36)       | 2.41<br>(2.21, 2.6)        | 0.24<br>(0.16, 0.32)    | -0.02<br>(-0.12, 0.09)        |                   |
| Total brain volume (cm <sup>3</sup> )     |                            |                            |                         |                            |                            |                         |                               | 0.64              |
| eGFR ≥60                                  | 1139.9<br>(1129.2, 1150.5) | 1109.7 (1098.9, 1120.4)    | -30.2<br>(-32.3, -28.2) | 1140.2<br>(1129.4, 1151.0) | 1113.0<br>(1102.1, 1123.9) | -27.2<br>(-29.4, -24.9) | -3.0<br>(-6.1, 0.02)          |                   |
| eGFR <60                                  | 1112.1<br>(1097.7, 1126.4) | 1082.7<br>(1068.2, 1097.2) | -29.4<br>(-32.5, -26.2) | 1108.5<br>(1093.7, 1123.3) | 1083.4<br>(1068.5, 1098.4) | -25.1<br>(-28.5, -21.6) | -4.3<br>(-9.0, 0.3)           |                   |

Interaction p-value is testing the difference in change between eGFR groups. Estimates are based on a linear mixed model adjusting for intracranial volume (except in CBF models) and days since randomization, with random effects for participant and MRI facility. All estimates computed using the baseline mean intracranial volume (except in CBF models) of 1382.03 cm<sup>3</sup>, with follow-up estimates computed at 1452 days (3.98 years) post-randomization. For change estimates, negative values denote decreases from baseline, while positive values indicating increases from baseline. Difference in change represents intensive treatment group minus standard treatment group.

SE denotes Standard Error, CI confidence interval, WML white matter lesion, asinh inverse hyperbolic sine transformation,  $f(x) = \log(x + (x^2 + 1)^{0.5})$ .

There were N=671, 713, and 716 participants included in the cerebral blood flow, WML volume, and brain volume analyses, respectively.

Abbreviations: eGFR – estimated glomerular filtration rate, MRI – magnetic resonance imaging, SE - standard error, CI - confidence interval, WML - white matter lesion,

**Table S4.** Effect of SPRINT intervention on change in cerebral blood flow, white matter lesion volume, and total brain volume, including individuals scanned outside of baseline window.

| MRI measure                               | Intensive                  |                            |                         | Standard                   |                            |                         | Difference in Change (95% CI) | P for interaction |
|-------------------------------------------|----------------------------|----------------------------|-------------------------|----------------------------|----------------------------|-------------------------|-------------------------------|-------------------|
|                                           | Baseline (95% CI)          | Follow-up (95% CI)         | Change (95% CI)         | Baseline (95% CI)          | Follow-up (95% CI)         | Change (95% CI)         |                               |                   |
| Global cerebral blood flow (mL/100 g/min) |                            |                            |                         |                            |                            |                         |                               | 0.47              |
| eGFR ≥60                                  | 36.74<br>(33.53, 39.96)    | 38.28<br>(34.87, 41.69)    | 1.54<br>(-0.12, 3.2)    | 35.57<br>(32.32, 38.82)    | 34.98<br>(31.36, 38.24)    | -0.77<br>(-2.51, 0.96)  | 2.31<br>(-0.08, 4.7)          |                   |
| eGFR <60                                  | 37.92<br>(33.84, 42.01)    | 39.37<br>(35.07, 43.66)    | 1.44<br>(-0.69, 3.58)   | 39.2<br>(35.08, 43.32)     | 36.84<br>(32.45, 41.23)    | -2.36<br>(-4.63, -0.1)  | 3.8<br>(0.7, 6.91)            |                   |
| WML volume, asinh(cm <sup>3</sup> )       |                            |                            |                         |                            |                            |                         |                               | 0.19              |
| eGFR ≥60                                  | 1.88<br>(1.72, 2.04)       | 2.01<br>(1.84, 2.17)       | 0.13<br>(0.08, 0.17)    | 1.87<br>(1.7, 2.03)        | 2.14<br>(1.97, 2.31)       | 0.27<br>(0.22, 0.32)    | -0.14<br>(-0.21, -0.07)       |                   |
| eGFR <60                                  | 2.23<br>(2.05, 2.40)       | 2.44<br>(2.26, 2.61)       | 0.21<br>(0.14, 0.28)    | 2.15<br>(1.97, 2.32)       | 2.43<br>(2.25, 2.61)       | 0.28<br>(0.21, 0.35)    | -0.07<br>(-0.16, 0.03)        |                   |
| Total brain volume (cm <sup>3</sup> )     |                            |                            |                         |                            |                            |                         |                               | 0.83              |
| eGFR ≥60                                  | 1139.2<br>(1128.3, 1150.0) | 1108.9<br>(1097.9, 1119.8) | -30.3<br>(-32.3, -28.2) | 1137.9<br>(1126.8, 1149.0) | 1110.7<br>(1099.5, 1121.9) | -27.2<br>(-29.5, -24.9) | -3.1<br>(-6.2, -0.03)         |                   |
| eGFR <60                                  | 1113.3<br>(1098.9, 1127.6) | 1084.6<br>(1070.2, 1099.0) | -28.6<br>(-31.6, -25.7) | 1108.2<br>(1093.7, 1122.6) | 1082.0<br>(1067.5, 1096.6) | -26.1<br>(-29.2, -23.0) | -2.5<br>(-6.8, 1.8)           |                   |

Interaction p-value is testing the difference in change between eGFR groups. Estimates are based on a linear mixed model adjusting for intracranial volume (except in CBF models) and days since randomization, with random effects for participant and MRI facility. All estimates computed using the baseline mean intracranial volume (except in CBF models) of 1382.03 cm<sup>3</sup>, with follow-up estimates computed at 1452 days (3.98 years) post-randomization. For change estimates, negative values denote decreases from baseline, while positive values indicating increases from baseline. Difference in change represents intensive treatment group minus standard treatment group.

SE denotes Standard Error, CI confidence interval, WML white matter lesion, asinh inverse hyperbolic sine transformation,  $f(x) = \log(x + (x^2 + 1)^{0.5})$ .

There were N=701, 744, and 747 participants included in the cerebral blood flow, WML volume, and brain volume analyses, respectively.

Abbreviations: eGFR – estimated glomerular filtration rate, MRI – magnetic resonance imaging, SE - standard error, CI - confidence interval, WML - white matter lesion,

**Table S5.** Effect of SPRINT intervention on change in cerebral blood flow, white matter lesion volume, and total brain volume, stratified by albuminuria, including individuals scanned outside baseline window.

| MRI measure                                     | Intensive                  |                            |                         | Standard                   |                            |                         | Difference in Change (95% CI) | P for interaction |
|-------------------------------------------------|----------------------------|----------------------------|-------------------------|----------------------------|----------------------------|-------------------------|-------------------------------|-------------------|
|                                                 | Baseline (95% CI)          | Follow-up (95% CI)         | Change (95% CI)         | Baseline (95% CI)          | Follow-up (95% CI)         | Change (95% CI)         |                               |                   |
| Global cerebral blood flow                      |                            |                            |                         |                            |                            |                         |                               | 0.56              |
| ACR <30                                         | 36.73<br>(33.39, 40.07)    | 38.65<br>(35.18, 42.12)    | 1.92<br>(0.47, 3.37)    | 36.8<br>(33.44, 40.16)     | 35.72<br>(32.21, 39.23)    | -1.08<br>(-2.64, 0.47)  | 3.00<br>(0.89, 5.12)          |                   |
| ACR ≥30                                         | 39.43<br>(35.05, 43.81)    | 38.47<br>(33.47, 43.48)    | -0.95<br>(-4.42, 2.51)  | 38.1<br>(33.67, 42.53)     | 35.87<br>(30.85, 40.9)     | -2.23<br>(-5.75, 1.3)   | 1.27<br>(-3.66, 6.2)          |                   |
| Transformed WML Volume, asinh(cm <sup>3</sup> ) |                            |                            |                         |                            |                            |                         |                               | 0.06              |
| ACR <30                                         | 1.92<br>(1.81, 2.03)       | 2.05<br>(1.94, 2.16)       | 0.13<br>(0.09, 0.17)    | 1.9<br>(1.78, 2.01)        | 2.18<br>(2.06, 2.3)        | 0.28<br>(0.23, 0.33)    | -0.15<br>(-0.21, -0.09)       |                   |
| ACR ≥30                                         | 2.31<br>(2.08, 2.53)       | 2.53<br>(2.3, 2.76)        | 0.22<br>(0.14, 0.31)    | 2.3<br>(2.06, 2.55)        | 2.54<br>(2.29, 2.79)       | 0.24<br>(0.15, 0.33)    | -0.02<br>(-0.14, 0.11)        |                   |
| Total brain volume (cm <sup>3</sup> )           |                            |                            |                         |                            |                            |                         |                               | 0.26              |
| ACR <30                                         | 1130.0<br>(1116.2, 1143.8) | 1100.2<br>(1086.3, 1114.1) | -29.8<br>(-31.7, -27.9) | 1124.9<br>(1110.9, 1138.8) | 1097.1<br>(1083.1, 1111.0) | -27.9<br>(-29.9, -25.8) | -1.94<br>(-4.73, 0.85)        |                   |
| ACR ≥30                                         | 1113.6<br>(1094.2, 1132.9) | 1084.2<br>(1064.6, 1103.7) | -29.4<br>(-33.5, -25.3) | 1112.0<br>(1092.2, 1131.8) | 1088.2<br>(1068.2, 1108.1) | -23.8<br>(-28.2, -19.5) | -5.53<br>(-11.52, 0.46)       |                   |

Interaction p-value is testing the difference in change between UACR groups. Estimates are based on a linear mixed model adjusting for intracranial volume (except in CBF models) and days since randomization, with random effects for participant and MRI facility. All estimates computed using the baseline mean intracranial volume (except in CBF models) of 1382.03 cm<sup>3</sup>, with follow-up estimates computed at 1452 days (3.98 years) post-randomization. For change estimates, negative values denote decreases from baseline, while positive values indicating increases from baseline. Difference in change represents intensive treatment group minus standard treatment group.

SE denotes Standard Error, CI confidence interval, WML white matter lesion, asinh inverse hyperbolic sine transformation,  $f(x) = \log(x + (x^2 + 1)^{0.5})$ .

There were N=675, 718, and 721 participants included in the cerebral blood flow, WML volume, and brain volume analyses, respectively.

Abbreviations: eGFR – estimated glomerular filtration rate, MRI – magnetic resonance imaging, SE - standard error, CI - confidence interval, WML - white matter lesion,
